# Supplementary material for: Pleurotus nebrodensis polysaccharide(PN50G) evokes A549 cell apoptosis by the ROS/AMPK/PI3K/AKT/mTOR pathway to suppress tumor growth
Source: Royal Society of Chemistry journal article supplement (doi:10.1039/c6fo00027d), 2016-01-01
Supplement: c6fo00027d1.pdf [file c6fo00027d1.pdf]

**Supplementary data for**

***Pleurotus nebrodensis* polysaccharide(PN50G) evokes A549  
cell apoptosis by ROS/AMPK/PI3K/AKT/mTOR pathway to  
suppress tumor growth**

Haiyan Cui, Shufen Wu, Yunfei Shang, Zhenjing Li, Mianhua Chen,  
Fengjuan Li, Changlu Wang\*

---

\* Corresponding author (Changlu Wang).

Address:

Key Laboratory of Food Nutrition and Safety, Ministry of Education, School of Food Engineering  
and Biotechnology, Tianjin University of Science and Technology, Tianjin 300457, PR China

Tel: +86 22 -6027-2219

Fax: +86 22 -6027-2219

E-mail address: [clw123@tust.edu.cn](mailto:clw123@tust.edu.cn)

## Isolation and purification of PN50G

Polysaccharides were isolated from fresh *P. nebrodensis* (1 kg) using boiling bath method, and then proteins were discarded by Sevage assay. Furthermore, polysaccharides were purified using a gel permeation chromatography column (60 × 2.6 cm) packed with Sepharose 2B gel. Six fractions (noted as PN50E, PN50F, PN50G, PN50H, PN50I and PN50J **Fig.S1**) were collected, freeze-dried, and then used for activity evaluation. PN50G showed higher inhibition rates than others (**Fig.S2**).

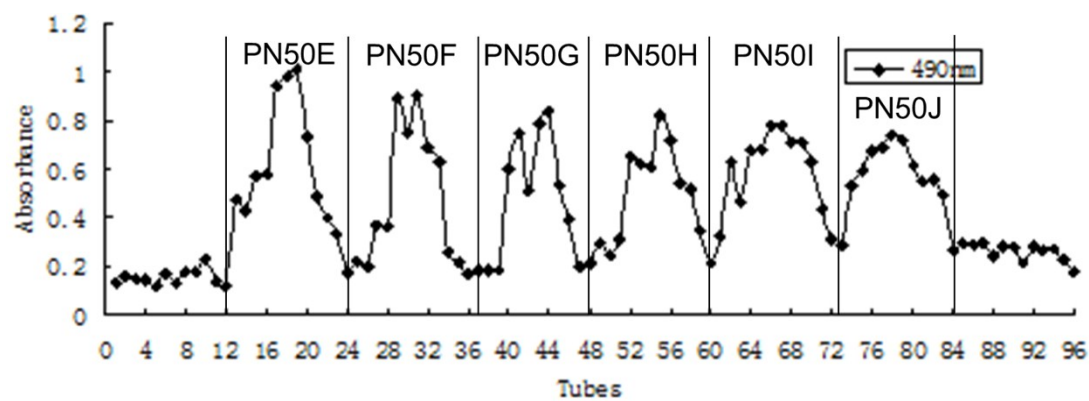

**Fig.S1** Elution pattern of the purified polysaccharide from a Sepharose 2B gel-permeation column.

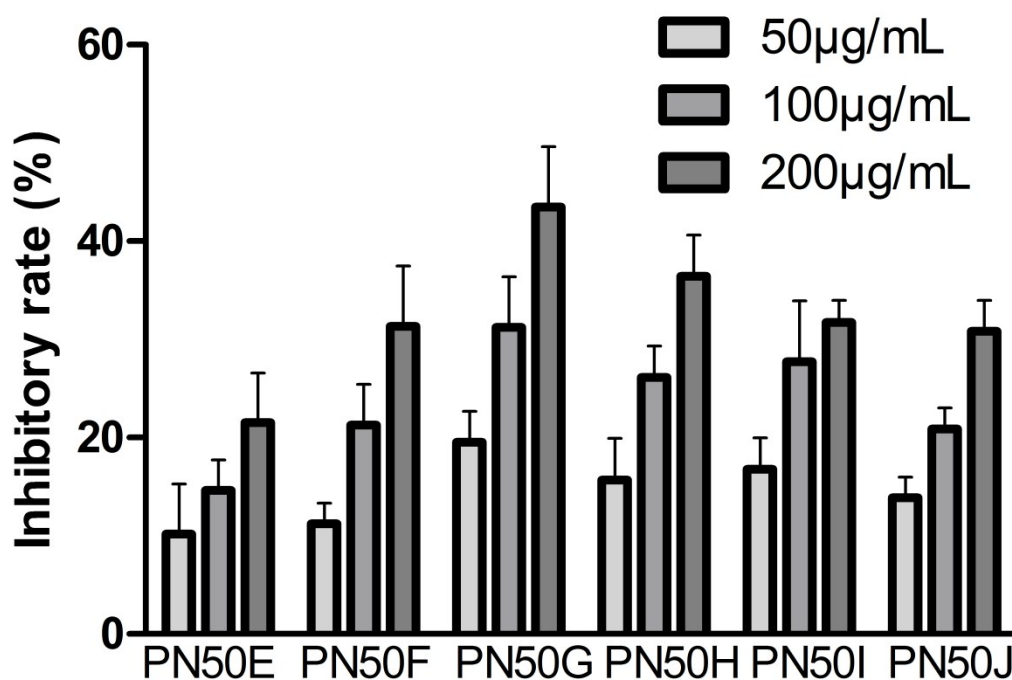

**Fig.S2** Effects of PN50 on the viability of A549 cells at different concentrations (n = 6).

### Structural features of PN50G

The molecular mass of PN50G was determined to be 261 kDa by HPLC and the percentage of total sugar was determined to be 92.40% by the phenol–sulfuric acid method. The structural features of PN50G were further investigated by chemical and instrumental analyses, including fourier-transform infrared spectroscopy, high-performance liquid chromatography, gas chromatography, periodate oxidation, smith degradation, methylation analysis, and  $^{13}\text{C}$  and  $^1\text{H}$  nuclear magnetic resonance spectroscopy. Results revealed the structure of the repeating units of PN50G as follows (the article referenced has been submitted):

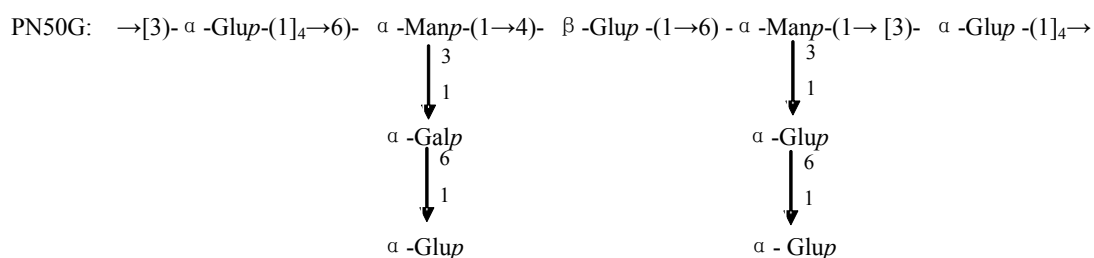

**Fig.S3** The structure of the repeating unit of PN50G.
